# Supplementary material for: Effects of nitrogen and biochar amendment on soil methane concentration profiles and diffusion in a rice-wheat annual rotation system
Source: PubMed Central journal article supplement (PMC5144129; doi:10.1038/srep38688), 2016-12-08
Supplement: srep38688-s1.pdf [file srep38688-s1.pdf]

1 **Supplementary material**

2

3 Effects of nitrogen and biochar amendment on soil methane concentration  
4 profiles and diffusion in a rice-wheat annual rotation system

5 Xin Xu, Zhen Wu, Yubing Dong, Ziqiang Zhou, Zhengqin Xiong

6

7 **Figure legends**

8 Fig. S1. Dynamics of soil water-filled pore space (WFPS) of the two wheat seasons  
9 during 2013–2015. The error bars show the standard deviations (n=3).

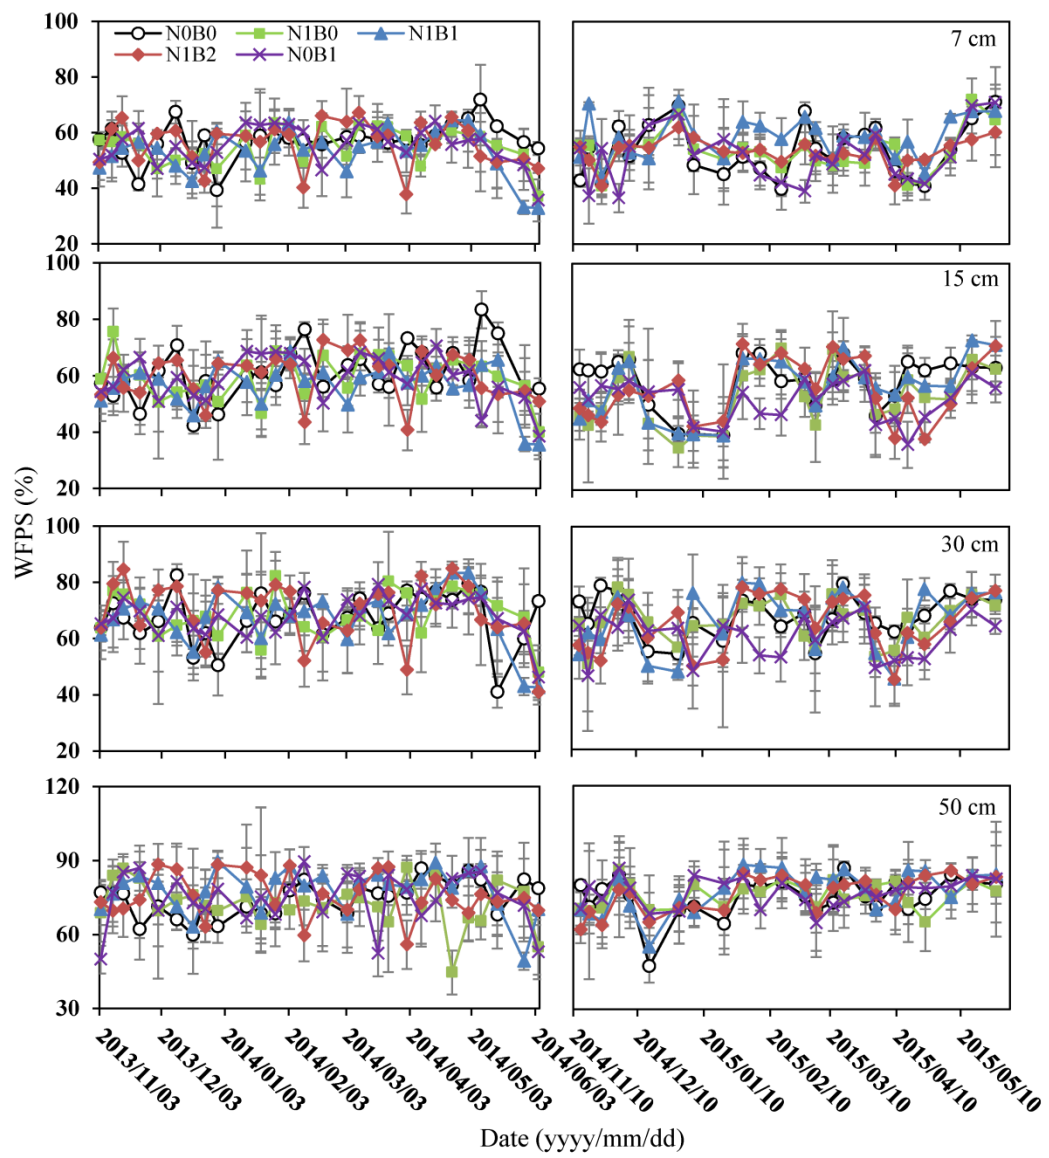

10

11

12 Fig. S2. Daily mean air and soil temperature (°C) and precipitation (mm) during the  
13 rice-wheat rotation in 2013-2015 in MoLing Town, Nanjing, Jiangsu Province, China.

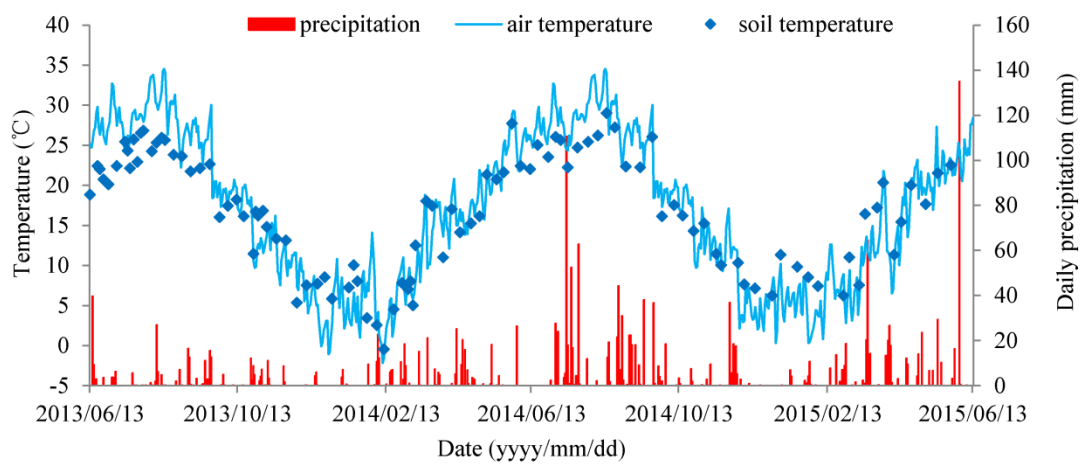

14

15

16 Fig. S3. Schematic design of the soil gas collection device

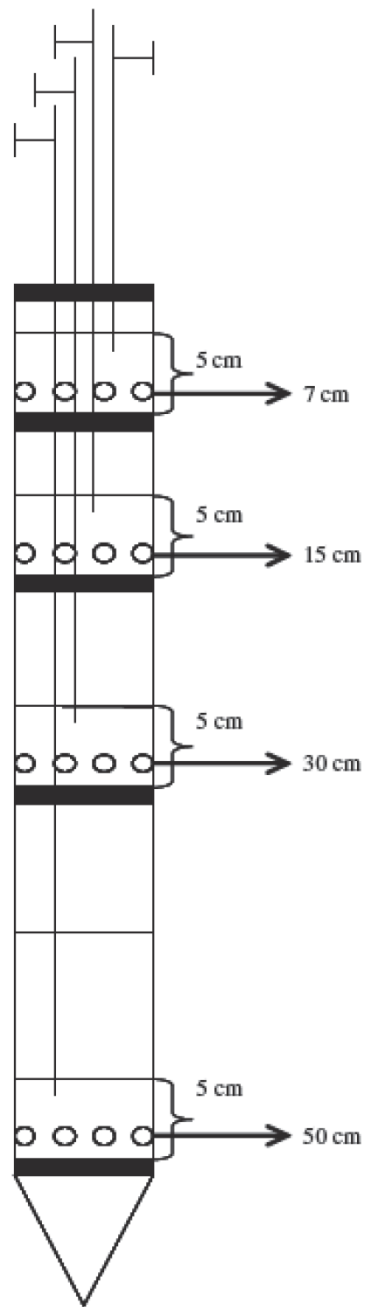

17

18 **Table S1** Soil CH<sub>4</sub> concentration profiles ( $\mu\text{L L}^{-1}$ ) among different N fertilizer and biochar treatments that were averaged over the rice and  
 19 wheat seasons

| Year         | Crop season  | Depth of soil (cm) | CH <sub>4</sub> concentrations ( $\mu\text{L L}^{-1}$ ) |           |            |            |                 | Factors         | F-value | P-value |
|--------------|--------------|--------------------|---------------------------------------------------------|-----------|------------|------------|-----------------|-----------------|---------|---------|
|              |              |                    | N0B0                                                    | N0B1      | N1B0       | N1B1       | N1B2            |                 |         |         |
| 2013-2014    | Rice season  | 7                  | 5.31±1.76                                               | 7.22±0.57 | 27.83±3.74 | 25.84±6.05 | 17.92±1.26      |                 |         |         |
|              |              | 15                 | 5.56±1.27                                               | 7.44±0.71 | 20.29±1.82 | 16.35±3.82 | 14.39±1.20      | Treatment       | 41.595  | 0.000   |
|              |              | 30                 | 5.71±1.58                                               | 6.43±0.50 | 13.61±1.01 | 10.10±3.52 | 10.35±1.81      | Depth           | 46.91   | 0.000   |
|              |              | 50                 | 3.93±0.91                                               | 6.50±1.28 | 12.39±1.10 | 11.07±1.51 | 10.66±0.31      | Treatment*Depth | 9.151   | 0.000   |
|              | Wheat season | 7                  | 1.49±0.09                                               | 1.62±0.22 | 2.10±0.38  | 1.87±0.38  | 1.88±0.75       |                 |         |         |
|              |              | 15                 | 2.23±0.91                                               | 2.03±0.57 | 2.01±0.68  | 1.97±0.07  | 2.05±1.56       | Treatment       | 1.207   | 0.367   |
|              |              | 30                 | 2.19±1.04                                               | 2.35±1.03 | 2.85±1.25  | 1.73±0.19  | 3.05±2.22       | Depth           | 3.808   | 0.020   |
|              |              | 50                 | 2.72±1.39                                               | 2.92±0.55 | 3.13±1.32  | 1.39±0.51  | 2.23±0.84       | Treatment*Depth | 1.54    | 0.165   |
| 2014-2015    | Rice season  | 7                  | 5.08±1.48                                               | 6.46±1.15 | 39.53±9.56 | 28.92±7.23 | 19.87±2.41      |                 |         |         |
|              |              | 15                 | 4.15±0.10                                               | 4.77±1.67 | 24.92±4.20 | 19.23±3.34 | 12.60±3.66      | Treatment       | 20.552  | 0.000   |
|              |              | 30                 | 4.69±0.67                                               | 4.47±0.85 | 21.63±2.88 | 14.30±7.04 | 15.83±1.99      | Depth           | 16.598  | 0.000   |
|              |              | 50                 | 5.49±0.96                                               | 5.57±0.58 | 13.4±4.77  | 12.15±4.96 | 10.94±5.68      | Treatment*Depth | 3.852   | 0.001   |
| Wheat season | 7            | 1.47±0.03          | 1.68±0.17                                               | 1.45±0.27 | 1.43±0.19  | 1.71±0.41  |                 |                 |         |         |
|              | 15           | 1.36±0.46          | 1.51±0.22                                               | 1.51±0.25 | 1.39±0.36  | 1.51±0.19  | Treatment       | 1.491           | 0.277   |         |
|              | 30           | 1.46±0.15          | 1.73±0.16                                               | 1.44±0.18 | 1.38±0.15  | 1.50±0.22  | Depth           | 1.5             | 0.235   |         |
|              | 50           | 1.60±0.12          | 1.88±0.44                                               | 1.81±0.17 | 1.36±0.13  | 1.39±0.30  | Treatment*Depth | 1.088           | 0.404   |         |

20 B0, B1 and B2 represent biochar applied at the rates of 0, 20 and 40 t ha<sup>-1</sup>, respectively; N0 and N1 represent N fertilizer applied at the rates of 0 and 250 kg N ha<sup>-1</sup> crop<sup>-1</sup>, respectively.

21 Data are Means ± SD.

22 **Table S2** The CH<sub>4</sub> emissions and diffusive effluxes (μg C m<sup>-2</sup> h<sup>-1</sup>) among different N fertilizer and biochar treatments averaged over the rice and  
 23 wheat seasons

| Year      | Crop season  | Δx/cm   | CH <sub>4</sub> fluxes/mg C m <sup>-2</sup> h <sup>-1</sup> |             |             |             |             | Factors         | F -value | P-value |
|-----------|--------------|---------|-------------------------------------------------------------|-------------|-------------|-------------|-------------|-----------------|----------|---------|
|           |              |         | N0B0                                                        | N0B1        | N1B0        | N1B1        | N1B2        |                 |          |         |
| 2013-2014 | Rice season  | Surface | 1059.3±36.4                                                 | 1056.6±31.2 | 2325.4±69.7 | 1859.5±70.5 | 1424.2±27.1 |                 |          |         |
|           |              | 7-0     | 32.4±18.6                                                   | 54.7±6.1    | 236.8±45.7  | 230.2±63.9  | 145.4±18.2  | Treatment       | 5.686    | 0.001   |
|           |              | 15-7    | 2.7±4.6                                                     | 2.4±3.8     | -50.9±32.1  | -58.8±16.9  | -19.1±4.9   | Depth           | 194.791  | 0.000   |
|           |              | 30-15   | 0.0±2.4                                                     | -4.4±2.7    | -22.9±6.2   | -19.7±13.2  | -9.2±6.9    | Treatment*Depth | 20.256   | 0.000   |
|           |              | 50-30   | -4.0±1.6                                                    | 0.5±3.0     | -0.6±5.8    | 0.1±5.9     | 1.2±4.1     |                 |          |         |
|           | Wheat season | Surface | 159.3±12.3                                                  | 160.4±17.1  | 176.8±13.9  | 173.2±10.1  | 143.3±16.2  |                 |          |         |
|           |              | 7-0     | 4.5±2.4                                                     | 6.4±8.8     | 29.2±3.0    | 16.9±15.0   | 15.7±7.3    | Treatment       | 0.527    | 0.716   |
|           |              | 15-7    | 14.0±16.7                                                   | 7.5±13.2    | 0.7±2.3     | 1.0±9.9     | 0.3±7.3     | Depth           | 13.365   | 0.000   |
|           |              | 30-15   | -1.7±1.9                                                    | -1.1±5.5    | -0.6±3.7    | -1.5±1.4    | 3.0±6.1     | Treatment*Depth | 2.392    | 0.019   |
|           |              | 50-30   | 1.1±1.4                                                     | 2.6±1.1     | 0.0±1.6     | -1.1±0.3    | -2.0±4.2    |                 |          |         |
| 2014-2015 | Rice season  | Surface | 334.3±49.9                                                  | 553.8±138.4 | 1497.9±68.1 | 1367.3±83.0 | 1119.9±63.3 |                 |          |         |
|           |              | 7-0     | 41.0±8.7                                                    | 56.6±12.9   | 427.7±67.3  | 308.6±81.1  | 207.0±94.5  | Treatment       | 4.737    | 0.003   |
|           |              | 15-7    | -7.0±9.1                                                    | -13.0±18.0  | -111.5±41.0 | -73.9±44.8  | -55.5±22.7  | Depth           | 117.530  | 0.000   |
|           |              | 30-15   | 2.0±5.5                                                     | -1.1±8.6    | -12.2±26.2  | -18.3±13.8  | -12.0±11.4  | Treatment*Depth | 15.341   | 0.000   |
|           |              | 50-30   | 2.2±0.6                                                     | 3.1±3.1     | -23.0±18.9  | 6.0±32.9    | -13.7±20.0  |                 |          |         |
|           | Wheat season | Surface | 141.2±46.8                                                  | 160.2±66.3  | 120.0±23.5  | 146.5±13.3  | 109.6±90.4  |                 |          |         |
|           |              | 7-0     | 17.1±4.9                                                    | 22.5±8.9    | 18.2±10.6   | 15.4±8.5    | 24.6±13.5   | Treatment       | 0.507    | 0.731   |
|           |              | 15-7    | -2.0±3.3                                                    | -3.5±7.0    | 6.8±14.1    | -2.6±5.7    | -0.1±6.0    | Depth           | 34.358   | 0.000   |
|           |              | 30-15   | 0.5±1.1                                                     | 2.7±1.2     | -1.5±2.5    | 0.5±1.6     | -1.7±2.0    | Treatment*Depth | 0.710    | 0.733   |
|           |              | 50-30   | -0.1±1.0                                                    | 0.9±1.1     | 2.1±1.5     | -0.2±1.6    | 0.4±2.3     |                 |          |         |

24 B0, B1 and B2 represent biochar applied at the rates of 0, 20 and 40 t ha<sup>-1</sup>, respectively; N0 and N1 represent N fertilizer applied at the rates of 0 and 250 kg N ha<sup>-1</sup> crop<sup>-1</sup>, respectively.

25 Data are Means ± SD.

26 **Table S3** The Basic physicochemical properties of soil in the different layers

| Substances     | pH                       | Organic C             | Total N               | CEC                      | Bulk density          |
|----------------|--------------------------|-----------------------|-----------------------|--------------------------|-----------------------|
| Soil layer(cm) | (1:2.5) H <sub>2</sub> O | (g kg <sup>-1</sup> ) | (g kg <sup>-1</sup> ) | (cmol kg <sup>-1</sup> ) | (g cm <sup>-3</sup> ) |
| 0-7            | 5.91 ±0.16c              | 16.23±0.83a           | 1.43±0.07a            | 28.60±0.11a              | 1.15±0.03c            |
| 7-15           | 6.53±0.12b               | 12.51±1.30b           | 1.35±0.09ab           | 26.73±0.09a              | 1.20±0.02c            |
| 15-30          | 7.01±0.15a               | 8.72±1.41c            | 1.19±0.09bc           | 22.31±0.13bc             | 1.32±0.01b            |
| 30-50          | 6.72±0.20ab              | 6.91±1.07c            | 1.05±0.11c            | 19.80±0.11c              | 1.41±0.01a            |

27 Means ± SD, different lowercase letters within the same crop season in the same column indicate a significant  
 28 difference at  $P < 0.05$  based on Student's multiple range tests.

29 **Table S4** Timetables of cultivation during the rice-wheat annual rotation system

| Year | 2013-2014                 |             | 2014-2015    |             |              |
|------|---------------------------|-------------|--------------|-------------|--------------|
|      | Management measures       | Rice season | Wheat season | Rice season | Wheat season |
|      | ploughing                 | 2013/6/13   | 2013/10/28   | 2014/6/3    | 2014/11/3    |
|      | Water flooding            | 2013/6/18   | -            | 2014/6/9    | -            |
|      | Basal fertilizer applied  | 2013/6/19   | 2013/11/3    | 2014/6/10   | 2014/11/13   |
|      | Sowing or transplanting   | 2013/6/19   | 2013/11/5    | 2014/6/11   | 2014/11/15   |
|      | The first top-dressing    | 2013/7/12   | 2014/1/20    | 2014/7/7    | 2015/1/23    |
|      | Mid-season drainage start | 2013/7/19   | -            | 2014/7/21   | -            |
|      | Mid-season drainage end   | 2013/7/25   | -            | 2014/7/28   | -            |
|      | The second top-dressing   | 2013/8/6    | 2014/3/3     | 2014/8/12   | 2015/3/10    |
|      | Gain                      | 2013/10/18  | 2014/5/28    | 2014/10/25  | 2015/5/26    |

30
